# Supplementary material
Source: MDPI journal article supplement (https://www.mdpi.com/2311-5637/8/1/22)
Supplement: s1 [file s1]

**Supplementary Materials:** The following are available online at [www.mdpi.com/xxx/s1](http://www.mdpi.com/xxx/s1), Figure S1: DNA fragments and nucleic acid electrophoresis in the construction of the strain. Table S1: Bacterial strains and plasmids used in this study. Table S2: Oligonucleotides used in this study. Figure S2: Evolutionary tree of amino acid transporter gene in *Bacillus licheniformis* from NCBI. Figure S3: Cell growth in minimal medium with free L-Asp as the only carbon and nitrogen source.

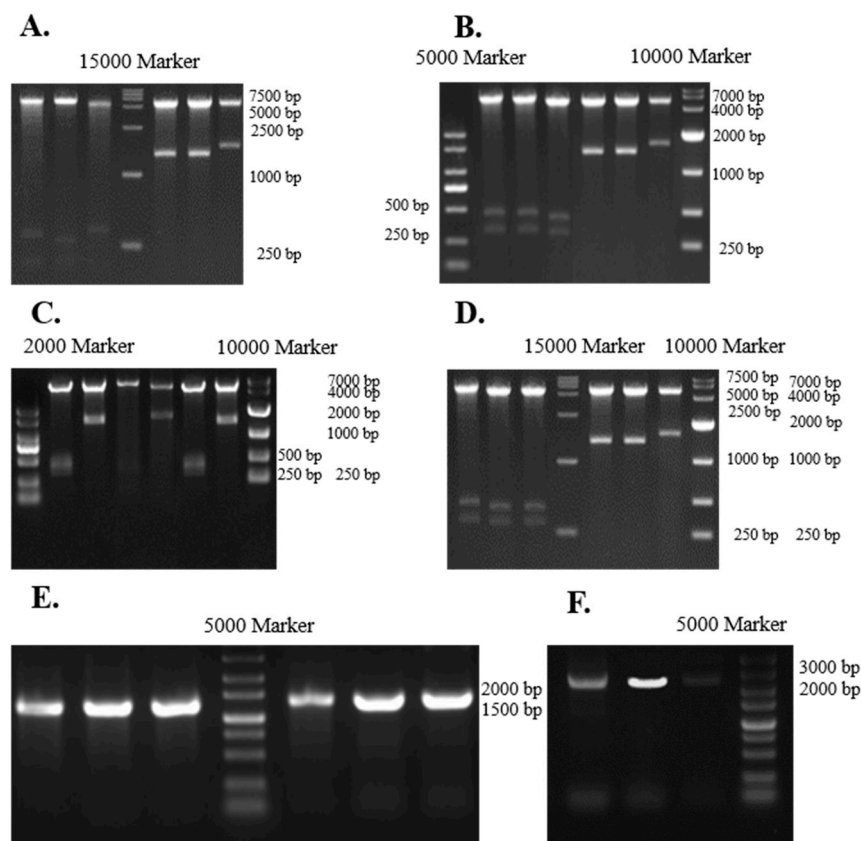

**Figure S1:** DNA fragments and nucleic acid electrophoresis in the construction of the strain. (A) (B) (C) The nucleic acid electrophoretogram of the fragments obtained after double-enzyme digestion of the overexpressed protein particles. The overexpression of genes *ydgF*, *yvbW*, and *yveA* was mediated by different promoters in *B. licheniformis*. (A) The overexpression of the three genes mediated by promoter *PmtlA*; (B) The overexpression of the three genes mediated by promoter *Pshuttle09*; (C) The overexpression of gene *ydgF* mediated by promoter *Pshuttle09-XBS*; (D) Nucleic acid electrophoresis of gene fragments of the expressed protein on the plasmid and PCR amplified promoter fragments; (E) (F) The nucleic acid electrophoretogram when verifying whether three genes are knocked out separately in *B. licheniformis* CICIM B1391; (E) The left exchange and right exchange of the three single knockout strains; (F) The double ex-change of the three single knockout strains.

**Table S1.** Bacterial strains and plasmids used in this study

| Strain and plasmid | Genotype or phenotype                                                                                | Reference            |
|--------------------|------------------------------------------------------------------------------------------------------|----------------------|
| Plasmid            |                                                                                                      |                      |
| pHY300-PLK         | <i>E. coli/Bacillus</i> shuttle vector, Ap <sup>R</sup> /Tet <sup>R</sup>                            | TaKaRa               |
| pMD19T-simple      | <i>E. coli</i> cloning vector, Ap <sup>R</sup>                                                       | TaKaRa               |
| pNZT1              | The delivery vector of replication thermosensitive and rolling circle amplification, Em <sup>R</sup> | Laboratory construct |
| pNZTT              | pNZT1 inset a tetracycline gene for Tet <sup>r</sup> at Not                                          | Laboratory construct |
| pMF                | Promoter <i>PmtlA</i> mediated protein YdgF overexpression                                           | This work            |
| pS09F              | Promoter <i>Pshuttle09</i> mediated protein YdgF overexpression                                      | This work            |
| pS09XF             | Promoter <i>Pshuttle09-XBS</i> mediated protein YdgF overexpression                                  | This work            |
| pMW                | Promoter <i>PmtlA</i> mediated protein YvbW overexpression                                           | This work            |
| pS09W              | Promoter <i>Pshuttle09</i> mediated protein YvbW overexpression                                      | This work            |
| pS09XW             | Promoter <i>Pshuttle09-XBS</i> mediated protein YvbW overexpression                                  | This work            |
| pMA                | Promoter <i>PmtlA</i> mediated protein YvbA overexpression                                           | This work            |
| pS09A              | Promoter <i>Pshuttle09</i> mediated protein YvbA overexpression                                      | This work            |
| pS09XA             | Promoter <i>Pshuttle09-XBS</i> mediated protein YvbA overexpression                                  | This work            |
| 19T- <i>ydgf</i>   | pMD19T-simple with the <i>ydgf</i> fragment and its homology arm                                     | This work            |
| 19T- <i>yvbW</i>   | pMD19T-simple with the <i>yvbW</i> fragment and its homology arm                                     | This work            |
| 19T- <i>yveA</i>   | pMD19T-simple with the <i>yveA</i> fragment and its homology arm                                     | This work            |
| 19T-FFKF           | pMD19T-simple with the deletion cassette of <i>ydgf</i>                                              | This work            |
| 19T-WFKF           | pMD19T-simple with the deletion cassette of <i>yvbW</i>                                              | This work            |
| 19T-AFKF           | pMD19T-simple with the deletion cassette of <i>yveA</i>                                              | This work            |

|                                           |                                                                                                                              |           |
|-------------------------------------------|------------------------------------------------------------------------------------------------------------------------------|-----------|
| pNZTT-FFKF                                | Knock-out vector pNZTT with the deletion cassette of <i>ydgF</i>                                                             | This work |
| pNZTT-WFKF                                | Knock-out vector pNZTT with the deletion cassette of <i>yvbW</i>                                                             | This work |
| pNZTT-AFKF                                | Knock-out vector pNZTT with the deletion cassette of <i>yveA</i>                                                             | This work |
| Strains                                   |                                                                                                                              |           |
| <i>E. coli</i> JM109                      | F', traD36, proAB + lacIq, Δ(lacZ), M15/Δ (lac-proAB), gln V44, e14-, gyrA96, recA1, relA1, endA1, thi, hsdR17 (CICIM B0012) | CICIM-CU  |
| <i>Bacillus licheniformis</i> CICIM B1391 | Wild type (CICIM B1391)                                                                                                      | CICIM-CU  |
| BldF                                      | <i>Bacillus licheniformis</i> CICIM B1391, knockout of <i>ydgF</i> gene, Kan <sup>r</sup>                                    | This work |
| BldW                                      | <i>Bacillus licheniformis</i> CICIM B1391, knockout of <i>yvbW</i> gene, Kan <sup>r</sup>                                    | This work |
| BldA                                      | <i>Bacillus licheniformis</i> CICIM B1391, knockout of <i>yveA</i> gene, Kan <sup>r</sup>                                    | This work |
| BlpMF                                     | <i>Bacillus licheniformis</i> CICIM B1391, harboring pMF                                                                     | This work |
| BlpS09F                                   | <i>Bacillus licheniformis</i> CICIM B1391, harboring pS09F                                                                   | This work |
| BlpS09XF                                  | <i>Bacillus licheniformis</i> CICIM B1391, harboring pS09XF                                                                  | This work |
| BlpMW                                     | <i>Bacillus licheniformis</i> CICIM B1391, harboring pMW                                                                     | This work |
| BlpS09W                                   | <i>Bacillus licheniformis</i> CICIM B1391, harboring pS09W                                                                   | This work |
| BlpS09XW                                  | <i>Bacillus licheniformis</i> CICIM B1391, harboring pS09XW                                                                  | This work |
| BlpMA                                     | <i>Bacillus licheniformis</i> CICIM B1391, harboring pMA                                                                     | This work |
| BlpS09A                                   | <i>Bacillus licheniformis</i> CICIM B1391, harboring pS09A                                                                   | This work |
| BlpS09XA                                  | <i>Bacillus licheniformis</i> CICIM B1391, harboring pS09XA                                                                  | This work |
| BlpHY                                     | <i>Bacillus licheniformis</i> CICIM B1391, harboring pHY300-PLK                                                              | This work |
| BldFpHY                                   | <i>Bacillus licheniformis</i> CICIM B1391, <i>dydgF</i> , harboring pHY300-PLK                                               | This work |
| BldWpHY                                   | <i>Bacillus licheniformis</i> CICIM B1391, <i>dyvbW</i> , harboring pHY300-PLK                                               | This work |
| BldApHY                                   | <i>Bacillus licheniformis</i> CICIM B1391, <i>dyveA</i> , harboring pHY300-PLK                                               | This work |
| BldFpS09F                                 | <i>Bacillus licheniformis</i> CICIM B1391, <i>dydgF</i> , harboring                                                          | This work |

---

|           |                                                                     |           |
|-----------|---------------------------------------------------------------------|-----------|
|           | pS09F                                                               |           |
| BldWpS09W | <i>Bacillus licheniformis</i> CICIM B1391, <i>dyvbw</i> , harboring | This work |
|           | pS09W                                                               |           |
| BldApS09A | <i>Bacillus licheniformis</i> CICIM B1391, <i>dyveA</i> , harboring | This work |
|           | pS09A                                                               |           |

---

<sup>1</sup> Ap<sup>R</sup>, ampicillin resistance; Tet<sup>R</sup>, tetracycline resistance; Kan<sup>R</sup>, kanamycin resistance; Em<sup>R</sup>, erythromycin resistance

<sup>2</sup> CICIM-CU: Culture and Information Center of Industrial Microorganisms of China Universities

**Table S2.** Oligonucleotides used in this study

| Primers                          | Sequence                                                                                |
|----------------------------------|-----------------------------------------------------------------------------------------|
| <i>yvbW</i> -F                   | CGGGGTACCCCGATGGAGAAAGACATGCAGAAGCTCG                                                   |
| <i>yveA</i> -F                   | CGGGGTACCCCGTTGTCAAATCAGGGCAATTTCAAAA                                                   |
| <i>yveA</i> -R                   | GCGTCGACGTCTTTAAACGGTTTCTTCTTTTTTCTCA                                                   |
| <i>ydgF</i> -F                   | CGGGGTACCCCGGTGACAGAAGATGTAAGTACGACAACG                                                 |
| <i>ydgF</i> -R                   | GGAAGATCTTCCCTACACTTGCTGTGACTTAGGTTT                                                    |
| Kan-M-F                          | GAGCTGTTTGAATATGCAGGCAAATGGCGTAATATTCGTG                                                |
| Kan-M-R                          | TTCTACGATAAGGGCACAAATCGCATCGTGGAACGTTT                                                  |
| <i>ydgFL</i> - <i>Xho</i> I-F    | CCCAAGCTTGGGTCATCATCCGCTTGCCGT                                                          |
| <i>ydgFR</i> - <i>Hind</i> III-R | CCGCTCGAGCCTCGGGCCTCCCGTTTTT                                                            |
| FFRT- <i>Kpn</i> I-Kan-F         | CGGGGTACCCCGGAAGTTCCTATTCCGAAGTTCCTATTCT<br>CTAGAAAGTATAGGAACTTCGGC                     |
| FFRT- <i>Sal</i> I-Kan-R         | GCGTCGACGTCTTGCCATAGCGGCCGCGGAAGTTCCTAT<br>ACTTTCTAGAGAATAGGAACTTCGGAATAGGAACTTCCA<br>C |
| <i>ydgF</i> - <i>Kpn</i> I-R     | GCGTCGACGTCTTGCCATAGCGGCCGCGAAACCTAAGT<br>CACAGCAAGTG                                   |
| <i>ydgF</i> - <i>Sal</i> I-F     | CGGGGTACCCCGCAGTTACATCTTCTGTAC                                                          |
| <i>ydgF</i> -L-F                 | GCCAGCCGACGTATTCACAAGAACA                                                               |
| <i>ydgF</i> -L-R                 | TTTTGTTGAGCTTTCGTTCCCTCCTA                                                              |
| <i>yvbWL</i> - <i>Xho</i> I-F    | CCGCTCGAGCGGAGCATAATCCCTCCCGAACCGATGC                                                   |
| <i>yvbWR</i> - <i>Sal</i> I-R    | GCGTCGACGTCTTCCCTTGTATTTTCCAATGGGAAAGG<br>CTAGCTAGCTAGATCGAAGTTCCTATTCCGAAGTTCCTATT     |
| WFRT- <i>Nhe</i> I-Kan-F         | CTCTAGAAAGTATAGGAACTTCGGC                                                               |
| WFRT- <i>Eco</i> RI-Kan-R        | CCGGAATTCCGGATCGAAGTTCCTATACTTTCTAGAGAAT<br>AGGAACTTCGGAATAGGAACTTCCAC                  |
| <i>yvbW</i> - <i>Nhe</i> I-R     | CTAGCTAGCTAGCGTCCGCTTCTTAAAAAAGGCTTG                                                    |
| <i>yvbW</i> - <i>Eco</i> RI-F    | CCGGAATTCCGGCTCCATCTATGTTCACTTCCTCTAG                                                   |
| <i>yvbW</i> -L-F                 | ACATTGCCGGACGGCTTAAATACTGGCGGAGTTC                                                      |
| <i>yvbW</i> -L-R                 | CGGTTCACTCTATCATCGTTAAATATTTTGTAAGT                                                     |
| <i>yveAL</i> - <i>Xho</i> I-F    | CCGCTCGAGCGGATTGAATGCCGGTGTACCGCTTGTT                                                   |
| <i>yveAR</i> - <i>Pst</i> I-R    | TGCACTGCAGTGCACCTGGAACGGGATGCTTCCCAAACA<br>CGGGGTACCCCGATCGAAGTTCCTATTCCGAAGTTCCTAT     |
| AFRT- <i>Kpn</i> I-Kan-F         | TCTCTAGAAAGTATAGGAACTTCGGC                                                              |
| AFRT- <i>Sal</i> I-Kan-R         | GCGTCGACGTCTTATCGAAGTTCCTATACTTTCTAGAGAAT                                               |

---

|                     |                                        |
|---------------------|----------------------------------------|
|                     | AGGAACTTCGGAATAGGAACTTCC               |
| <i>yveA</i> -KpnI-R | CGGGGTACCCCGGACAAATCACTTCCTCCTTTTAAAT  |
| <i>yveA</i> -SalI-F | GCGTCGACGTCTTTAAATAAGAATCCCCCGCGTATGGA |
| <i>yveA</i> -L-F    | CCGGAATTTTATCATATGTGCATCGAAGCATTGAG    |
| <i>yveA</i> -L-R    | ACCTTGATACTAATGATGTGTCCTTCACACAATAA    |

---

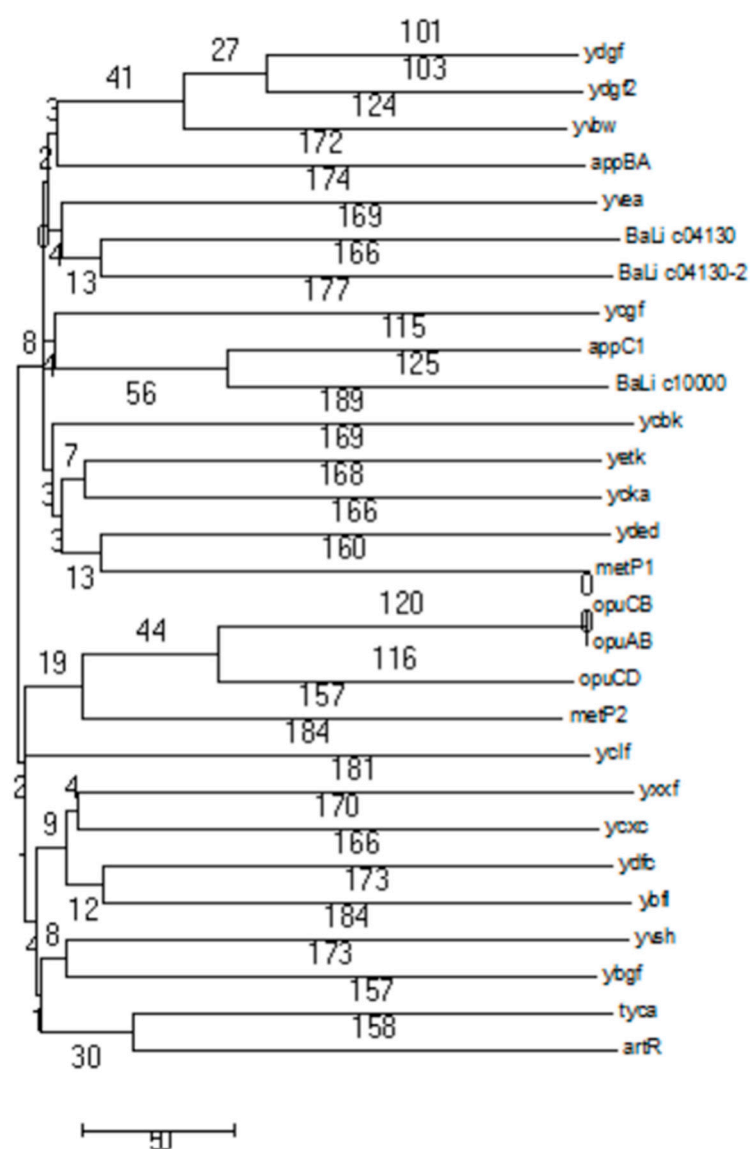

**Figure S2:** Evolutionary tree of amino acid transporter gene in *Bacillus licheniformis* from NCBI.

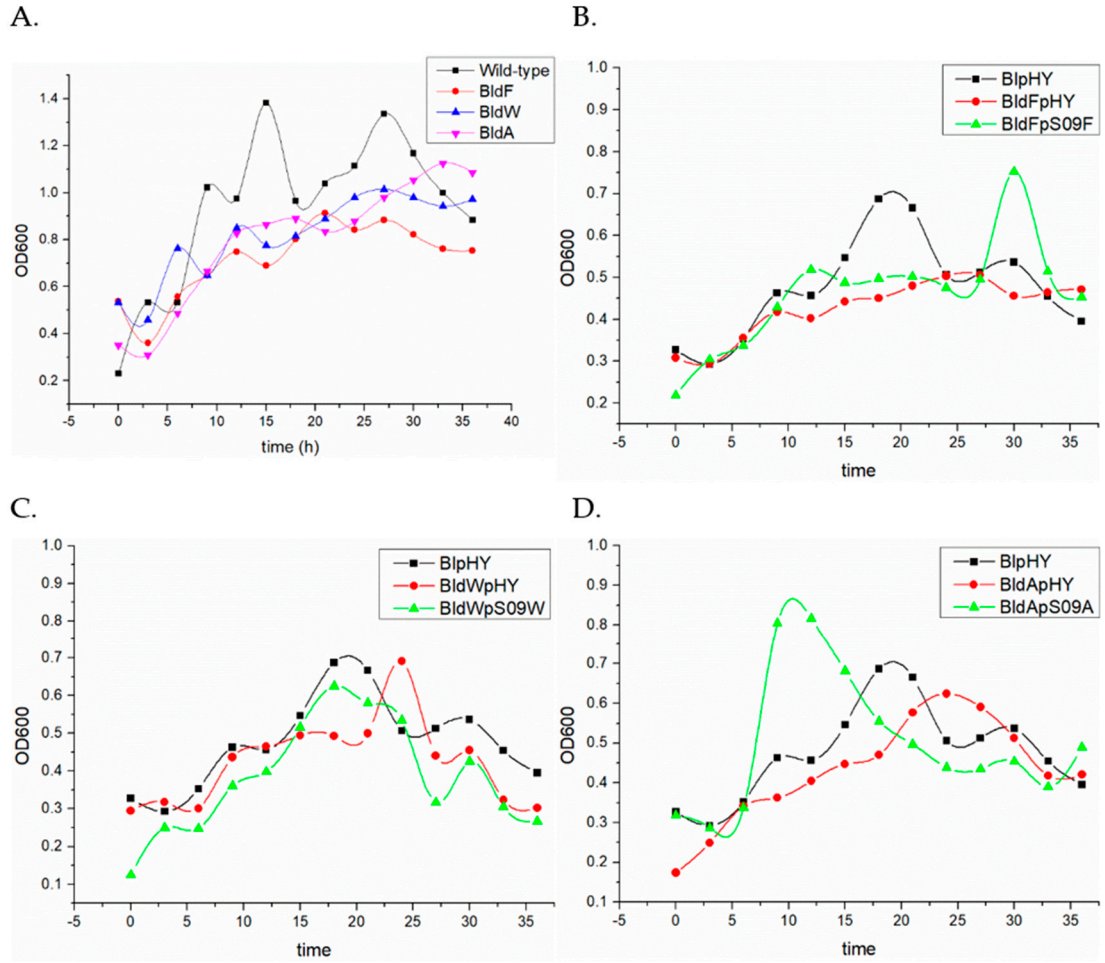

**Figure S3:** Cell growth in minimal medium with free L-Asp as the only carbon and nitrogen source. (A) The growth curve of wild-type strain (solid square), strain BldF (solid circle), strain BldW (solid regular triangle) and strain BldA (solid inverted triangle); (B) (C) (D) Strains BldHY (solid squares), transporter gene single knockout strains with empty plasmids (solid circles) and transporter gene single knockout strains with *Pshuttle09* promoter mediated transporter gene overexpression plasmids, which means the transporter gene is supplemented and expressed in the strains with single knock-out transporter gene (solid equi-lateral triangle); (B) Strain BldFpS09F; (C) Strain BldWpS09W; (D) Strain BldApS09A.
